1 Navigating infection risk during oviposition and larval foraging in a  
2 holometabolous insect

3

4 Jonathon A. Siva-Jothy<sup>1§</sup>, Katy M. Monteith<sup>1§</sup>, Pedro F. Vale<sup>1,2\*</sup>

5 <sup>1</sup>Institute of Evolutionary Biology, School of Biological Sciences, University of Edinburgh,

6 EH9 3FL Edinburgh, United Kingdom

7 <sup>2</sup>Centre for Immunity, Infection and Evolution, University of Edinburgh, EH9 3FL Edinburgh,

8 United Kingdom

9

10 §These authors contributed equally

## 11 **Abstract**

12 Deciding where to eat and raise offspring carries important fitness consequences for all  
13 animals, especially if foraging, feeding and reproduction increase the risk of exposure to  
14 pathogens. In insects with complete metamorphosis, foraging occurs mainly during the larval  
15 stage, while oviposition decisions are taken by adult-stage females. Selection for infection  
16 avoidance behaviours may therefore be developmentally uncoupled. Using a combination of  
17 experimental infections and behavioural choice assays, here we tested if *Drosophila*  
18 *melanogaster* fruit flies avoid potentially infectious environments at distinct developmental  
19 stages. When given conspecific fly carcasses as a food source, larval-stage flies did not  
20 discriminate between carcasses that were clean or infected with the pathogenic *Drosophila* C  
21 Virus (DCV), even though scavenging was a viable route of DCV transmission. Adult females  
22 however, discriminated between different oviposition sites, laying more eggs near a clean  
23 rather than an infectious carcass if they were healthy; DCV-infected females did not  
24 discriminate between the two environments. While potentially risky, laying eggs near  
25 potentially infectious carcasses was always preferred to sites containing only fly medium. Our  
26 findings suggest that infection avoidance can play an important role in how mothers provision  
27 their offspring, and underline the need to consider infection avoidance behaviours at multiple  
28 life-stages.

29

30

31 **Key words:** infection avoidance; foraging; oviposition site choice; *Drosophila*; *Drosophila* C  
32 virus; infection risk

## 33 **Introduction**

34 The behavioural immune system, the suite of behaviours that allow animals to avoid contact  
35 with infectious environments or conspecifics, is the first line of defence against infection [1–  
36 3]. Avoidance of infection relies on detecting cues of parasite presence - such as visual cues of  
37 infection risk or secondary pathogen metabolites – and integrating this sensory information to  
38 avoid sources of infection [4–10]. In addition to external cues of infection risk, the internal  
39 state of the animal, including its physiological status as a result of prior pathogen exposure,  
40 may also affect the ability to detect and avoid infection [11–13].

41

42 Avoiding contact with pathogens allows healthy individuals to escape the pathology that results  
43 from infection, and also prevents the deployment of the immune response, which may be  
44 metabolically costly and even cause immunopathology[2,3,14]. Despite these clear advantages,  
45 avoiding infection completely is rarely possible. Foraging and feeding, for example, are vital  
46 aspects of host metabolism, and are key to organismal reproduction and fitness, but they are  
47 also major routes of pathogen transmission [15,16].

48

49 Foraging and feeding are particularly important for holometabolous insect larvae, which devote  
50 most of their time to these behaviours. In situations of severe nutritional scarcity, larvae may  
51 even resort to cannibalism. For example, larvae of the fruit fly *Drosophila melanogaster*  
52 readily eat the carcasses of conspecifics following periods of starvation [17,18]. Cannibalism  
53 may appear to be a beneficial strategy when the alternative is starvation, but may increase the  
54 risk of trophic transmission of pathogens and parasites, especially if infected individuals are  
55 more likely to be targeted for cannibalism. While larvae of many insect species are frequently  
56 observed to avoid infectious environments or food sources [19], it is currently unclear if trophic  
57 infection avoidance occurs during cannibalistic scavenging.

58

59 Beyond foraging during the larval stage, choosing where to oviposit or rear offspring is another  
60 important life-history decision, but can be risky if individuals are unable to identify and avoid  
61 potentially infectious environments. The environment in which adult insects choose to oviposit  
62 is therefore a major determinant both of offspring environmental quality and infection risk  
63 [7,16,20]. Infection avoidance by insects during oviposition has been observed in response to  
64 a number of parasites and appears to be driven by diverse sensory cues, including avoidance  
65 of parasitoid wasp visual cues [7], and olfactory detection of bacteria and fungi [6,10].  
66 Together, both adult oviposition choice and larval food preference determine the likelihood of  
67 infection in the early life-stages of holometabolous insects, and therefore both behaviours play  
68 an important role in disease transmission dynamics [4,21].

69

70 Here, we investigate larval foraging and adult oviposition in a holometabolous insect - the fruit  
71 fly *Drosophila melanogaster* - in the context of infection avoidance. Our study consisted of  
72 choice assays performed on either larval or adult stage *D. melanogaster*. Fly larvae were  
73 presented with a choice of scavenging on either a clean, non-infectious adult fly carcass, or a  
74 carcass that had been previously inoculated with a systemic *Drosophila C Virus* (DCV)  
75 infection (Figure 1a). In a second experiment, we tested adult oviposition choice by giving  
76 female flies the choice to lay eggs on a clean food source, a clean food source also containing  
77 a clean carcass, and a food source containing a carcass with a systemic DCV infection (Figure  
78 1b). This 3-way choice assay allowed us to examine an important conflict faced by mothers: a  
79 carcass may present an additional nutritional source for future offspring, but may also present  
80 a potential risk of infection. In both experiments we assessed the fitness consequences of  
81 choices at both life-stages by following the development and longevity of larva (or laid eggs)  
82 as adult flies.

83  
84

## 85 **Materials and Methods**

### 86 **Fly lines and rearing conditions**

87 Both experiments used laboratory stocks of *D.melanogaster* Oregon R (OreR). Fly stocks were  
88 kept in plastic bottles (6oz; Genesee Scientific, San Diego, California, US) on a standard diet  
89 of Lewis medium [22] at  $18\pm 1^\circ\text{C}$  with a 12 hour light:dark cycle. Stocks were tipped  
90 approximately every 21 days into new bottles. Before the experiments, flies were transferred  
91 to clean bottles and maintained at low density (~50 flies per bottle) for a minimum of two  
92 generations at  $25\pm 1^\circ\text{C}$  with a 12 hour light:dark cycle.

93

### 94 **Virus culture and infection**

95 *Drosophila C Virus* (DCV) is a horizontally transmitted positive-sense ssRNA virus of the  
96 Dicistroviridae family [23]. DCV infection establishes in the digestive, reproductive and fat  
97 tissues, resulting in a range of behavioural and physiological pathologies in both larval and  
98 adult stage flies, including reduced locomotor activity, metabolic and reproductive  
99 dysfunction, and eventually death [24–28]. The DCV isolate used in this experiment was  
100 originally isolated in Charolles, France [29] and was grown in Schneider *Drosophila* Line 2  
101 (DL2) as previously described [27], serially diluted ten-fold in TRIS-HCl solution (pH=7.3),  
102 aliquoted and frozen at  $-80^\circ\text{C}$  until required. To infect flies, Austerlitz insect pins (0.15mm in  
103 diameter) were bent at a  $90^\circ$  angle ~0.5mm from the tip, dipped in DCV ( $10^8$  infectious units  
104 (IU) per ml), and inserted into the pleural suture of flies under  $\text{CO}_2$  anaesthesia. Control  
105 infections employed the same protocol but with a needle tip dipped in sterile TRIS solution.

106

107 **Infection avoidance during larval foraging**

108 We first tested if fly larvae could discriminate between healthy and potentially infectious fly  
109 carcasses. To generate these carcasses 4-7 day old male and female flies were randomly  
110 selected from an age-matched population. For each sex, half of the flies were stabbed with  
111 DCV  $10^7$  DCV copies/ml and the other half stabbed with sterile TRIS buffer. Following 6 days  
112 (to allow viral replication), flies were frozen at  $-80\text{ }^\circ\text{C}$  until required. We confirmed the  
113 infection status of the carcasses using DCV-specific qRT-PCR(see below) by randomly  
114 picking 5 male and 5 female flies.

115

116 We carried out a two-choice assay by placing  $\sim 100$  fly eggs at the centre of each Petri dish  
117 containing  $\sim 20\text{ml}$  solid agar (5% sugar), and allowed the resulting 3<sup>rd</sup> instar larvae to forage  
118 towards either a clean fly carcass or a carcass infected with DCV, placed at an equidistant  
119 position from the eggs (3cm). We set up 56 ‘choice’ assays where larvae could choose between  
120 a clean or DCV infected carcass, and 20 ‘control’ assays, where both carcasses were clean (half  
121 of assays contained male carcasses, and the other half contained female carcasses). To  
122 differentiate between any effects of carcass degradation from a direct effect of DCV presence  
123 on larval choice, we also set up an additional 30 plates without fly carcasses, containing  $10\mu\text{l}$   
124 of DCV ( $10^7$ DCV IU/ml) and  $10\mu\text{l}$  of TRIS (two-choice; N=20) or only TRIS (control; N=10).  
125 18 of the 106 plates set up across all treatments were excluded from the final dataset due to  
126 damage to the agar discriminating larval movement and thus providing unreliable results. All  
127 assays were conducted at  $25\pm 1\text{ }^\circ\text{C}$  with a 12-hour light:dark cycle before being photographed  
128 after 72 hours. Images were marked using Adobe Photoshop CS3 to count the number of larvae  
129 within each plate half and within an area immediately surrounding the carcasses/droplets  
130 ( $\sim 2.2\text{cm}$  in diameter – see Figure 1a).

131

## 132 **Larval infection status and virus quantification**

133 We randomly selected 10 wandering-stage larvae found immediately adjacent to each carcass  
134 in 20 ‘choice plates’ and one carcass in 6 ‘control plates’ to assess DCV infection status and  
135 quantify viral load. Viral quantification was carried out by absolute quantification of DCV  
136 RNA copies using qRT-PCR. Total RNA was extracted by homogenising the flies or larvae  
137 in TRI Reagent (Invitrogen, Carlsbad, California, US) and using Direct-zol RNA miniprep kit  
138 (Zymo Research, Irvine, California, US), including a DNase step. The eluted RNA was then  
139 reverse-transcribed with M-MLV reverse transcriptase (Promega, Madison, Wisconsin, US)  
140 and random hexamer primers, and then diluted 1:1 with nuclease free water. The qRT-PCR  
141 was performed on an Applied Biosystems StepOnePlus system using Fast SYBR Green  
142 Master Mix (Applied Biosystems, Foster City, California, US) using the following forward  
143 and reverse primers, which include 5’-AT rich flaps to improve fluorescence [30]  
144 (DCV\_Forward: 5’ AATAAATCATAAGCCACTGTGATTGATACAACAGAC 3’;  
145 DCV\_Reverse: 5’ AATAAATCATAAGAAGCACGATACTTCTTCCAAACC 3’; with the  
146 following PCR cycle: 95°C for 2min followed by 40 cycles of: 95°C for 10 sec followed by  
147 60°C for 30 sec. Two qRT-PCR reactions (technical replicates) were carried out per sample.  
148 For absolute quantification of DCV, the concentrations of DCV in the samples were  
149 extrapolated from a standard curve created from a 10-fold serial dilution ( $1-10^{-6}$ ) of DCV  
150 cDNA.

151

## 152 **Larval development and infection status**

153 To analyse the effect of foraging choice on larval development, we removed 15 larvae found  
154 within 2cm of each carcass from 20 ‘choice’ plates and from one carcass on 6 ‘control’ plates.  
155 Larvae from each carcass were transferred together into plastic vials containing Lewis medium

156 and we recorded the number of larvae that developed into pupae and the number of eclosed  
157 adults.

158

### 159 **Infection avoidance during oviposition**

160 Following our test of infection avoidance at the larval stage, we tested the oviposition  
161 preference of female *D. melanogaster* when presented with a choice of clean and potentially  
162 infectious oviposition sites. Choice chambers were constructed by joining two lids of  
163 transparent plastic Petri dishes with adhesive tape, making a chamber 10cm in diameter and 2  
164 cm in height. Chambers contained three oviposition sites comprised of upturned caps filled  
165 with Lewis medium, arranged in a triangle, each site, 50mm from the other two (Figure 1b).  
166 Oviposition sites contained either only Lewis medium, Lewis medium and an uninfected fly  
167 carcass, or Lewis medium and a DCV-infected fly carcass (infection protocol described above).

168

169 Three-day-old flies ( $N=40$  males and 40 females) were isolated as virgins and stabbed with a  
170 virus-contaminated or sterile, virus-free control solution. Following infection, flies to be used  
171 in the oviposition assay were introduced to two males for mating for 72 hours. We then  
172 introduced a single mated female fly to each chamber and placed at 25°C (12-hour light:dark  
173 cycle) to allow oviposition. Two females (1 infected and 1 uninfected) laid no eggs during  
174 the experiment so were excluded from the final dataset. In total, we analysed the oviposition  
175 choice of 78 females. As DCV has been reported to affect *D. melanogaster* fecundity, to  
176 account for differences in the total number of eggs laid by our infection treatment group we  
177 measured oviposition site choice by counting the number of eggs at each site rather than the  
178 proportion of eggs laid at the three respective sites. To count the number of eggs laid on each  
179 oviposition site, photos were taken of individual oviposition sites with a Leica MC170 HD



180 camera attachment on a Leica 0.32x/WD 200mm S8APO microscope (Leica microsystems,  
181 Wetzlar, Germany) after 24 and 48 hours.

182

### 183 **Fitness consequences of oviposition site choice**

184 We quantified the potential fitness consequences of oviposition preference by transferring all  
185 oviposition sites, including carcass (if present), to individual vials and recorded egg-to-adult  
186 viability. Adults that eclosed from clutches during this experiment were frozen alongside in  
187 TRI reagent and DCV infection analysed using the same protocol as above. A total of 24  
188 clutches were analysed in this way, with 6 oviposition sites excluded due to degradation or  
189 contamination during qPCR preparation.

190

### 191 **Statistical Analyses**

192 In the larval choice experiment, we analysed the proportion of larvae choosing a given plate  
193 half or carcass area; larval DCV titers; the proportion of larvae developing into pupae (logit  
194 transformed); and the proportion of pupae that developed into adult flies (logit transformed).  
195 All response variables were analysed using Generalised Linear Models (GLMs) with ‘carcass  
196 sex’ and ‘carcass infection status’ and their interactions as fixed effects. In the adult oviposition  
197 experiment, we used the number of eggs laid at each oviposition site to assess infection  
198 avoidance. We analysed egg counts, rather than the proportion of eggs laid on each oviposition  
199 site, to account for potential differences in fecundity between infected and uninfected flies (e.g.  
200 [28,31]). The number of eggs laid in the two measuring periods (0-24 hours and 24-48 hours)  
201 was analysed separately using generalised linear mixed models (GLMM) with Poisson  
202 distributed error. The oviposition site, infection status of the fly as well as an interaction  
203 between the two were listed as fixed effects. The total number of eggs laid and the choice  
204 chamber were included as random effects, with the latter nested within the fly’s infection status,

205 to account for repeated measures and non-independence. The proportion of eggs that later  
206 eclosed as adults (egg-to-adult viability) was analysed using a GLMM with a binomially  
207 distributed error, with oviposition site included as a fixed effect. All statistical analyses and  
208 graphics were carried out and produced in R 3.3.0 using the *ggplot2*, *lme4* and *multcomp*  
209 packages.

210

## 211 **Results**

### 212 **Larval flies do not avoid infectious food sources when scavenging**

213 Fly larvae that hatched from eggs placed in the centre of the Petri dish, dispersed towards and  
214 consumed the fly carcasses placed at the edges of the dish (**Video S1**). We found no evidence  
215 that fly larvae can avoid infected food sources. Regardless of the measure of preference (plate  
216 half larvae were found in or the area surrounding each carcass or TRIS droplet) larvae showed  
217 no significant preference for clean or infected fly carcasses (Figures 2a, 2b; Table 1).

218

### 219 **DCV is transmitted to larvae when scavenging on infected carcasses**

220 DCV was detected in larvae collected from plates containing an infected carcass (Figure 3a,  
221 Table 1), confirming that scavenging infected carcasses is a viable route of virus transmission.  
222 As expected, larvae surrounding DCV-infected carcasses were found to have significantly  
223 higher DCV titres when compared to larvae collected from control plates (which contained  
224 only uninfected carcasses). However, we also detected DCV infection in larvae surrounding  
225 clean carcasses that were housed in a two-choice plate (containing both infected and uninfected  
226 carcasses) (Figure 3a), suggesting that some larvae may have moved between food sources in  
227 these plates during the assay.

228

## 229 **No effect of virus transmission on larval development**

230 Acquiring infection by scavenging on infectious carcasses had no detectable effect on larval  
231 development into pupae (Figure 3b), or in the proportion of pupae that eclosed as adults (Figure  
232 3c; Table 1). However, larval development to pupal stage was significantly higher in larvae  
233 that had fed on female carcasses (Figure 3b; Table 1): 50% of larvae feeding on female  
234 carcasses reached pupation, while a significantly lower proportion (32%) reached pupation if  
235 they had fed on male carcasses (Figure 3b). Following pupation, there was no effect of carcass  
236 sex or infection status on the proportion of pupae that eclosed as adults (Figure 3c, Table 1).

237

## 238 **Virus acquired during the larval stage can persist into adulthood**

239 We measured DCV titres in flies that eclosed as adults (Figure 3d). While no DCV infection  
240 was detected in flies originally collected near clean carcasses, we detected DCV in 7 out of 11  
241 adult flies that were collected from infected carcasses, suggesting that DCV infection can  
242 persist through metamorphosis into the adult insect stage.

243

## 244 **Oviposition preference changes over time and depends on the female's infection status**

245 Female flies showed a clear preference for oviposition sites containing a carcass, but this  
246 choice depended on the fly infection status (Figure 4a, 4b; Table 2). Within the first 24-hour  
247 period, uninfected female flies laid significantly more eggs at sites containing a clean carcass  
248 compared to sites with an infected carcass or just food (Figure 4a). Female flies infected with  
249 DCV, however, did not distinguish between infected and clean carcasses, but still laid  
250 significantly fewer eggs at sites without any carcass (Figure 4a). In the 24-48 hour  
251 observation period, uninfected females still laid more eggs at sites with carcasses, but no  
252 longer preferred the sites containing a clean carcass (Figure 4b; Table 2). DCV-infected  
253 females also laid more eggs at sites with an uninfected carcass (pairwise contrast,  $p < 0.0001$ ),

254 but laid even more eggs on sites containing an infected carcass (pairwise contrast,  $p < 0.001$ )  
255 (Figure 4b).

256

### 257 **Fitness consequences of oviposition preference**

258 Egg-to-Adult viability differed significantly between oviposition sites, and was lower in  
259 food-only sites compared to sites containing a carcass (Figure 4c; Table 2). Clutches  
260 emerging at carcass sites however, did not differ in their egg-to-adult viability (Figure 4c;  
261 Table 2), even though we detected DCV within flies that developed around DCV-infected  
262 carcasses (Figure 4d). The infection status of mothers had no effect on egg-to-adult viability  
263 (Figure 4c; Table 2) or on the viral load of these clutches (Figure 4d; Table 2).

264

265

## 266 **Discussion**

267 Viral infection is widespread among invertebrates [32,33], and can cause considerable  
268 morbidity and mortality [24,28,34,35]. We should therefore expect selection for mechanisms  
269 that allow hosts to detect and avoid infectious conspecifics or potentially infectious  
270 environments [3,4]. In the present work, we examined how larval foraging and adult  
271 oviposition in *D. melanogaster* are modified in the presence of potential infection by the  
272 horizontally transmitted Drosophila C virus (DCV), which is known to cause a variety of  
273 physiological and behavioural pathology in fruit flies [24–28].

274

275 Our results confirm previous findings that *Drosophila* larvae will actively cannibalise  
276 conspecific carcasses when placed in a nutrient-poor environment [17,18], and go further to  
277 demonstrate that necrophagy is a viable route for transmission of Drosophila C Virus. The  
278 consumption of infectious conspecifics, either through cannibalism or necrophagy, has been  
279 demonstrated as a viable route of infection in a wide range of mammalian, amphibian and

280 insect species [36–40]. In holometabolous insects, this phenomenon has been particularly well  
281 investigated in Lepidoptera, where cannibalism and/or necrophagy of infected conspecifics has  
282 also shown to be a viable route of transmission of several viruses during larval development  
283 [39,41–44].

284

285 Despite the risk of acquiring infection during cannibalistic foraging, we found no evidence that  
286 larval-stage flies could discriminate and avoid infectious carcasses from clean ones. Our  
287 findings contrast with a recent study in which *Drosophila* larvae showed evasion of food  
288 containing a bacterial suspension of virulent *Pseudomonas entomophila* [45]. Avoidance was  
289 no longer observed when using a less virulent strain of the bacterial pathogen, suggesting that  
290 external cues about the relative risk and severity of infection are key to avoidance behaviours.  
291 The differences in findings likely result from differential olfactory and chemo-sensory factors  
292 involved in viral and bacterial detection in *Drosophila* larvae. Furthermore, while Surendran *et*  
293 *al* (2017) tested evasion in 1<sup>st</sup> instar larvae, in the current study larval foraging choice was  
294 recorded during the 3<sup>rd</sup> instar, as this is the period of development when foraging activity and  
295 feeding is known to peak [46]. Given that larvae are known to actively migrate towards higher  
296 quality food [47], the lack of trophic infection avoidance suggests that selection for avoidance  
297 of this viral infection is weak. Weak selection for avoidance would be expected if, for example,  
298 the fitness costs of DCV infection are low during larval stage infection.

299

300 Our data is consistent with a low cost of infection in larvae, as the low titres of DCV acquired  
301 during larval feeding on carcasses did not have severe consequences for larval development.  
302 Our results contrast with a previous study on DCV infection of larval *D. melanogaster* which  
303 reported a 14% reduction in egg-to-adult viability, and severe mortality in adults emerged from  
304 infected larvae [26]. Larva in that study were exposed to a highly-concentrated homogenate of

305 DCV-infected flies, and exposed continuously during development until 4-days post-eclosion.  
306 This difference in viral exposure may explain the more severe costs of DCV infection  
307 compared to this study.

308

309 In contrast to the lack of discrimination seen during larval foraging, we found that adult  
310 female flies do discriminate between different types of oviposition sites. Uninfected female  
311 flies laid more eggs on sites containing an uninfected or infected carcass and food, than a site  
312 comprised only of food despite the infection risk this presents. One possible reason for this  
313 apparently risky strategy is that while a conspecific carcass can present an infection risk it is  
314 also a potential source of additional nutrition [48]. Starved *D. melanogaster* larvae assess the  
315 nutritional value of carcasses, ranging from conspecifics to natural predators (Ahmad *et al.*,  
316 2015), and tune their foraging strategies accordingly to optimally forage. Clutches developing  
317 on oviposition sites with a carcass present had significantly higher egg-to-adult viability than  
318 food only sites (Figure 4c). The preference we see for oviposition sites containing a carcass  
319 may therefore indicate that the nutritional value of carcasses on the oviposition sites, rather  
320 than infection risk, is driving oviposition-site preference.

321

322 During the first 24 hours of egg laying, uninfected flies laid significantly more eggs around  
323 uninfected carcasses. This suggests that the presence of DCV is being detected and avoided  
324 during oviposition. It is unclear which cues of DCV are detected by females, whether they are  
325 detecting the virus directly, or cues of virus derived pathology in the fly carcass. Similar  
326 avoidance of pathogenic bacteria has been described in both *D. melanogaster* [6,8,10] and *C.*  
327 *elegans* [49,50]. Avoidance of virus infection has also been described in a range of  
328 invertebrates, such as gypsy moth larvae that avoid eating leaves contaminated with virus [51]

329 and lobsters that avoid virus-infected conspecifics [52]. This avoidance likely relies on  
330 dedicated chemosensory pathways for olfactory cues [6,9,10,49].

331

332 Following the initial 24-hour period, this preference for uninfected carcasses was no longer  
333 observed (Figure 4b). We interpret this shift in oviposition-site preference as the result of a  
334 trade-off faced by females between minimising DCV infection risk and maximising fecundity.  
335 The finite nutritional value of each oviposition site dictates an optimal clutch size that each site  
336 can support. If females exceed this, fewer resources are available per offspring. As uninfected  
337 flies laid more eggs on non-infectious carcass sites in the first 24 hours, the optimal clutch size  
338 is approached sooner than the other two sites. Fruit flies integrate the nutritional quality of  
339 oviposition sites into deciding between laying more eggs and acquiring more resources to  
340 develop more eggs [53], a trade-off that is also seen in a range of other organisms [48,53–55].  
341 In order to maximise the number of eggs laid, females therefore appear to risk DCV infection  
342 by laying their eggs near an infected carcass. The relative nutritional value and the potential  
343 costs of DCV infection are patent in the egg-to-adult viability of offspring from each  
344 oviposition site: the increase in viability between the food-only site and both the uninfected  
345 and infected carcass sites reflects the nutritional difference between these sites. As is clear from  
346 Figure 4c, the benefits of oviposition near any carcass appear to outweigh the potential costs  
347 of virus infection.

348

349 In contrast to uninfected females, females infected with DCV did not discriminate between  
350 infectious and non-infectious carcasses, laying the same number of eggs in either oviposition  
351 site (Figure 4a,b). Furthermore, in the second 24-hour period, infected females laid  
352 significantly more eggs at infectious carcass sites. We interpret this difference in discrimination  
353 between infected and healthy females as being driven by the mother's, rather than the offspring

354 infection risk. For infected females already paying the cost of infection, there is little benefit  
355 from avoiding infectious sites.

356

357 In summary, our results show that *D. melanogaster* larvae and adults respond to infection risk  
358 differently during foraging and oviposition. Notably, oviposition site choice was affected by  
359 the female's infection status and the time-dependent nutritional value of oviposition sites. The  
360 initial DCV avoidance shown by mothers during oviposition may also explain why larvae do  
361 not avoid DCV during foraging. Alongside a relatively low cost of infection, larvae simply  
362 may not need to avoid infection because their mothers have evolved to avoid infectious sites  
363 where possible during oviposition. As larvae are not able to forage over large distances, their  
364 development - and ultimately their fitness - relies heavily on their mother's capacity to pick  
365 the environment that maximises nutritional value while minimising the risk of infection.

366

## 367 **References**

- 368 1. Parker BJ, Barribeau SM, Laughton AM, de Roode JC, Gerardo NM. 2011 Non-  
369 immunological defense in an evolutionary framework. *Trends Ecol. Evol.* **26**, 242–248.  
370 (doi:10.1016/j.tree.2011.02.005)
- 371 2. Schaller M, Park JH. 2011 The Behavioral Immune System (and Why It Matters). *Curr.*  
372 *Dir. Psychol. Sci.* **20**, 99–103. (doi:10.1177/0963721411402596)
- 373 3. Curtis VA. 2014 Infection-avoidance behaviour in humans and other animals. *Trends*  
374 *Immunol.* **35**, 457–464. (doi:10.1016/j.it.2014.08.006)
- 375 4. Kiesecker JM, Skelly DK, Beard KH, Preisser E. 1999 Behavioral reduction of infection  
376 risk. *Proc. Natl. Acad. Sci.* **96**, 9165–9168. (doi:10.1073/pnas.96.16.9165)
- 377 5. Kavaliers M, Choleris E, Ågmo A, Pfaff DW. 2004 Olfactory-mediated parasite  
378 recognition and avoidance: linking genes to behavior. *Horm. Behav.* **46**, 272–283.  
379 (doi:10.1016/j.yhbeh.2004.03.005)
- 380 6. Stensmyr MC *et al.* 2012 A Conserved Dedicated Olfactory Circuit for Detecting Harmful  
381 Microbes in *Drosophila*. *Cell* **151**, 1345–1357. (doi:10.1016/j.cell.2012.09.046)



- 382 7. Kacsoh BZ, Lynch ZR, Mortimer NT, Schlenke T a. 2013 Fruit flies medicate offspring  
383 after seeing parasites. *Science* **339**, 947–50. (doi:10.1126/science.1229625)
- 384 8. Babin A, Kolly S, Schneider F, Dolivo V, Zini M, Kawecki TJ. 2014 Fruit flies learn to avoid  
385 odours associated with virulent infection. *Biol. Lett.* **10**, 20140048.  
386 (doi:10.1098/rsbl.2014.0048)
- 387 9. Meisel JD, Panda O, Mahanti P, Schroeder FC, Kim DH. 2014 Chemosensation of  
388 Bacterial Secondary Metabolites Modulates Neuroendocrine Signaling and Behavior of  
389 *C. elegans*. *Cell* **159**, 267–280. (doi:10.1016/j.cell.2014.09.011)
- 390 10. Kurz CL, Charroux B, Chaduli D, Viallat-Lieutaud A, Royet J. 2017 Peptidoglycan sensing  
391 by octopaminergic neurons modulates *Drosophila* oviposition. *eLife* **6**.  
392 (doi:10.7554/eLife.21937)
- 393 11. Curtis V, de Barra M, Aunger R. 2011 Disgust as an adaptive system for disease  
394 avoidance behaviour. *Philos. Trans. R. Soc. Lond. B. Biol. Sci.* **366**, 389–401.  
395 (doi:10.1098/rstb.2010.0117)
- 396 12. Klemme I, Karvonen A. 2016 Learned parasite avoidance is driven by host personality  
397 and resistance to infection in a fish–trematode interaction. *Proc. R. Soc. Lond. B Biol. Sci.*  
398 **283**.
- 399 13. Vale PF, Jardine MD. 2016 Viral exposure reduces the motivation to forage in female  
400 *Drosophila melanogaster*. *Fly (Austin)* , 1–7. (doi:10.1080/19336934.2016.1207029)
- 401 14. Sears BF, Rohr JR, Allen JE, Martin LB. 2011 The economy of inflammation: when is less  
402 more? *Trends Parasitol.* **27**, 382–387. (doi:10.1016/j.pt.2011.05.004)
- 403 15. Hall SR, Sivars-Becker L, Becker C, Duffy MA, Tessier AJ, Cáceres CE. 2007 Eating yourself  
404 sick: transmission of disease as a function of foraging ecology. *Ecol. Lett.* **10**, 207–218.  
405 (doi:10.1111/j.1461-0248.2007.01011.x)
- 406 16. Lefèvre T, de Roode JC, Kacsoh BZ, Schlenke TA. 2011 Defence strategies against a  
407 parasitoid wasp in *Drosophila*: fight or flight? *Biol. Lett.* (doi:10.1098/rsbl.2011.0725)
- 408 17. Vijendravarma RK, Narasimha S, Kawecki TJ. 2013 Predatory cannibalism in *Drosophila*  
409 *melanogaster* larvae. *Nat. Commun.* **4**, 1789. (doi:10.1038/ncomms2744)
- 410 18. Ahmad M, Chaudhary SU, Afzal AJ, Tariq M. 2015 Starvation-Induced Dietary Behaviour  
411 in *Drosophila melanogaster* Larvae and Adults. *Sci. Rep.* **5**, 14285.  
412 (doi:10.1038/srep14285)
- 413 19. de Roode JC, Lefèvre T. 2012 Behavioral Immunity in Insects. *Insects* **3**, 789–820.  
414 (doi:10.3390/insects3030789)
- 415 20. Lefèvre T *et al.* 2012 Behavioural resistance against a protozoan parasite in the monarch  
416 butterfly. *J. Anim. Ecol.* **81**, 70–79. (doi:10.1111/j.1365-2656.2011.01901.x)

- 417 21. Ezenwa VO, Archie EA, Craft ME, Hawley DM, Martin LB, Moore J, White L. 2016 Host  
418 behaviour–parasite feedback: an essential link between animal behaviour and disease  
419 ecology. *Proc R Soc B* **283**, 20153078. (doi:10.1098/rspb.2015.3078)
- 420 22. Lewis E. 2014 A new standard food medium. 1960 *Drosophila* Information Service. in.  
421 *Cold Spring Harb. Protoc.* **2014**, pdb.rec081414. (doi:10.1101/pdb.rec081414)
- 422 23. Huszar T, Imler J. 2008 *Drosophila* Viruses and the Study of Antiviral Host-Defense. In  
423 *Advances in Virus Research*, pp. 227–265. Academic Press.
- 424 24. Arnold PA, Johnson KN, White CR. 2013 Physiological and metabolic consequences of  
425 viral infection in *Drosophila melanogaster*. *J. Exp. Biol.* **216**, 3350–3357.  
426 (doi:10.1242/jeb.088138)
- 427 25. Chtarbanova S *et al.* 2014 *Drosophila* C virus systemic infection leads to intestinal  
428 obstruction. *J. Virol.* **88**, 14057–14069. (doi:10.1128/JVI.02320-14)
- 429 26. Stevanovic A, Johnson KN. 2015 Infectivity of *Drosophila* C virus following oral delivery  
430 in *Drosophila* larvae. *J. Gen. Virol.* (doi:10.1099/vir.0.000068)
- 431 27. Vale PF, Jardine MD. 2015 Sex-specific behavioural symptoms of viral gut infection and  
432 *Wolbachia* in *Drosophila melanogaster*. *J. Insect Physiol.* **82**, 28–32.  
433 (doi:10.1016/j.jinsphys.2015.08.005)
- 434 28. Gupta V, Stewart C, Rund SS., Monteith K, Vale PF. 2017 Costs and benefits of sub-lethal  
435 *Drosophila* C virus infection. *J. Evol. Biol.* (doi:10.1111/jeb.13096)
- 436 29. Jousset F-X, Bergoin M, Revet B. 1977 Characterization of the *Drosophila* C Virus. *J. Gen.*  
437 *Virol.* **34**, 269–283. (doi:10.1099/0022-1317-34-2-269)
- 438 30. Afonina I, Ankoudinova I, Mills A, Lokhov S, Huynh P, Mahoney W. 2007 Primers with 5'  
439 flaps improve real-time PCR. *BioTechniques* **43**, 770, 772, 774.
- 440 31. Gomariz-Zilber E, Thomas-Orillard M. 1993 *Drosophila* C virus and *Drosophila* hosts: a  
441 good association in various environments. *J. Evol. Biol.* **6**, 677–689. (doi:10.1046/j.1420-  
442 9101.1993.6050677.x)
- 443 32. Webster CL *et al.* 2015 The Discovery, Distribution, and Evolution of Viruses Associated  
444 with *Drosophila melanogaster*. *PLoS Biol* **13**, e1002210.  
445 (doi:10.1371/journal.pbio.1002210)
- 446 33. Shi M *et al.* 2016 Redefining the invertebrate RNA virosphere. *Nature* **540**, 539–543.  
447 (doi:10.1038/nature20167)
- 448 34. Escobedo-Bonilla CM, Alday-Sanz V, Wille M, Sorgeloos P, Pensaert MB, Nauwynck HJ.  
449 2008 A review on the morphology, molecular characterization, morphogenesis and  
450 pathogenesis of white spot syndrome virus. *J. Fish Dis.* **31**, 1–18. (doi:10.1111/j.1365-  
451 2761.2007.00877.x)

- 452 35. Wilfert L, Long G, Leggett HC, Schmid-Hempel P, Butlin R, Martin SJM, Boots M. 2016  
453 Deformed wing virus is a recent global epidemic in honeybees driven by Varroa mites.  
454 *Science* **351**, 594–597. (doi:10.1126/science.aac9976)
- 455 36. Forbes LB. 2000 The occurrence and ecology of Trichinella in marine mammals. *Vet.*  
456 *Parasitol.* **93**, 321–334. (doi:10.1016/S0304-4017(00)00349-6)
- 457 37. Qureshi T, Labes RE, Lambeth M, Montgomery H, Griffin JFT, Mackintosh CG. 2000  
458 Transmission of *Mycobacterium bovis* from experimentally infected ferrets to non-  
459 infected ferrets (*Mustela furo*). *N. Z. Vet. J.* **48**, 99–104.  
460 (doi:10.1080/00480169.2000.36173)
- 461 38. Pearman PB, Garner TWJ, Straub M, Greber UF. 2004 Response of the Italian agile frog  
462 (*Rana latastei*) to a Ranavirus, frog virus 3: a model for viral emergence in naïve  
463 populations. *J. Wildl. Dis.* **40**, 660–669. (doi:10.7589/0090-3558-40.4.660)
- 464 39. Williams T, Hernández O. 2006 Costs of cannibalism in the presence of an iridovirus  
465 pathogen of *Spodoptera frugiperda*. *Ecol. Entomol.* **31**, 106–113. (doi:10.1111/j.0307-  
466 6946.2006.00771.x)
- 467 40. Alpers MP. 2008 The epidemiology of kuru: monitoring the epidemic from its peak to its  
468 end. *Philos. Trans. R. Soc. B Biol. Sci.* **363**, 3707–3713. (doi:10.1098/rstb.2008.0071)
- 469 41. Dhandapani N, Jayaraj S, Rabindra RJ. 1993 Cannibalism on nuclear polyhedrosis virus  
470 infected larvae by *Heliothis armigera* (Hubn.) and its effect  
471 on viral infection. *Int. J. Trop. Insect Sci.* **14**, 427–430.  
472 (doi:10.1017/S1742758400014089)
- 473 42. Vasconcelos SD. 1996 Alternative Routes for the Horizontal Transmission of a  
474 Nucleopolyhedrovirus. *J. Invertebr. Pathol.* **68**, 269–274. (doi:10.1006/jipa.1996.0095)
- 475 43. Boots M. 1998 Cannibalism and the stage-dependent transmission of a viral pathogen of  
476 the Indian meal moth, *Plodia interpunctella*. *Ecol. Entomol.* **23**, 118–122.  
477 (doi:10.1046/j.1365-2311.1998.00115.x)
- 478 44. Elvira S, Williams T, Caballero P. 2010 Juvenile Hormone Analog Technology: Effects on  
479 Larval Cannibalism and the Production of *Spodoptera exigua* (Lepidoptera:  
480 Noctuidae) Nucleopolyhedrovirus. *J. Econ. Entomol.* **103**, 577–582.  
481 (doi:10.1603/EC09325)
- 482 45. Surendran S, Hückesfeld S, Wöschle B, Pankratz MJ. 2017 Pathogen-induced food  
483 evasion behavior in *Drosophila* larvae. *J. Exp. Biol.* **220**, 1774–1780.  
484 (doi:10.1242/jeb.153395)
- 485 46. Sokolowski MB. 2001 *Drosophila*: Genetics meets behaviour. *Nat. Rev. Genet.* **2**, 879–  
486 890. (doi:10.1038/35098592)
- 487 47. Durisko Z, Dukas R. 2013 Attraction to and learning from social cues in fruitfly larvae.  
488 *Proc. R. Soc. B Biol. Sci.* **280**, 20131398–20131398. (doi:10.1098/rspb.2013.1398)

- 489 48. Albeny-Simões D, Murrell EG, Elliot SL, Andrade MR, Lima E, Juliano SA, Vilela EF. 2014  
490 Attracted to the enemy: *Aedes aegypti* prefers oviposition sites with predator-killed  
491 conspecifics. *Oecologia* **175**, 481–492. (doi:10.1007/s00442-014-2910-1)
- 492 49. McMullan R, Anderson A, Nurrish S. 2012 Behavioral and Immune Responses to  
493 Infection Require Gαq- RhoA Signaling in *C. elegans*. *PLoS Pathog.* **8**, e1002530.  
494 (doi:10.1371/journal.ppat.1002530)
- 495 50. Meisel JD, Kim DH. 2014 Behavioral avoidance of pathogenic bacteria by *Caenorhabditis*  
496 *elegans*. *Trends Immunol.* **35**, 465–70. (doi:10.1016/j.it.2014.08.008)
- 497 51. Parker BJ, Elder BD, Dwyer G. 2010 Host behaviour and exposure risk in an insect-  
498 pathogen interaction. *J. Anim. Ecol.* **79**, 863–870. (doi:10.1111/j.1365-  
499 2656.2010.01690.x)
- 500 52. Behringer DC, Butler MJ, Shields JD. 2006 Ecology: avoidance of disease by social  
501 lobsters. *Nature* **441**, 421. (doi:10.1038/441421a)
- 502 53. Lihoreau M, Poissonnier L-A, Isabel G, Dussutour A. 2016 *Drosophila* females trade off  
503 good nutrition with high-quality oviposition sites when choosing foods. *J. Exp. Biol.* **219**.
- 504 54. Blaustein L. 1999 Oviposition Site Selection in Response to Risk of Predation: Evidence  
505 from Aquatic Habitats and Consequences for Population Dynamics and Community  
506 Structure. In *Evolutionary Theory and Processes: Modern Perspectives* (ed SP Wasser),  
507 pp. 441–456. Springer Netherlands. (doi:10.1007/978-94-011-4830-6\_26)
- 508 55. Tjørnløv RS, Kissling WD, Barnagaud J-Y, Bøcher PK, Høye TT. 2015 Oviposition site  
509 selection of an endangered butterfly at local spatial scales. *J. Insect Conserv.* **19**, 377–  
510 391. (doi:10.1007/s10841-014-9747-0)

511

512

| <b>Response Variable</b>                      | <b>Predictor</b>                            | <b>DF</b> | <b><math>\chi^2</math></b> | <b>p-value</b> |
|-----------------------------------------------|---------------------------------------------|-----------|----------------------------|----------------|
|                                               | Carcass Sex/TRIS                            | 2         | 0.5991335                  | 0.7411         |
| <b>Larval Foraging Choice by Plate Half</b>   | Carcass Infection Status                    | 1         | 0.6326616                  | 0.4264         |
|                                               | Carcass Sex/TRIS * Carcass Infection Status | 2         | 2.7615792                  | 0.2514         |
| <b>Larval Foraging Choice by Carcass Area</b> | Carcass Sex/TRIS                            | 2         | 0.5124854                  | 0.7740         |
|                                               | Carcass Infection Status                    | 1         | 3.5960234                  | 0.0579         |
|                                               | Carcass Sex/TRIS * Carcass Infection Status | 2         | 4.498866                   | 0.1055         |
| <b>Larval DCV Titre</b>                       | Carcass Sex                                 | 1         | 0.6965869                  | 0.4039         |
|                                               | Carcass Infection Status                    | 2         | 6.422816                   | 0.0403*        |
|                                               | Carcass Sex * Carcass Infection Status      | 2         | 0.2180497                  | 0.8967         |
| <b>Adult DCV Titre</b>                        | Carcass Infection Status                    | 2         | 9.6744207                  | 0.0079**       |
| <b>Number of Larvae to Pupate</b>             | Carcass Sex                                 | 1         | 13.273693                  | 0.0003***      |
|                                               | Carcass Infection Status                    | 2         | 0.0745433                  | 0.9634         |
|                                               | Carcass Sex * Carcass Infection Status      | 2         | 0.6184649                  | 0.7340         |
| <b>Number of Pupae to Eclose</b>              | Carcass Sex                                 | 1         | 0.0173846                  | 0.8951         |
|                                               | Carcass Infection Status                    | 2         | 0.1799928                  | 0.9139         |
|                                               | Carcass Sex * Carcass Infection Status      | 2         | 0.1485258                  | 0.9284         |

514 **Table 1.** Model outputs for statistical tests performed on all experiments testing the causes and costs  
515 of infection avoidance in *D. melanogaster* larval foraging. Significant predictors are marked with  
516 asterisks (p<0.05=\*, p<0.01=\*\* and p<0.001=\*\*\*).

| <b>Response Variable</b>      | <b>Predictor</b>                             | <b>DF</b> | <b>F-ratio</b> | <b>p-value</b> |
|-------------------------------|----------------------------------------------|-----------|----------------|----------------|
| <b>Eggs Laid 0-24 hours</b>   | Oviposition Site                             | 2         | 133.2992       | <0.0001***     |
|                               | Maternal Infection Status                    | 1         | 1.1512         | 0.292          |
|                               | Oviposition Site * Maternal Infection Status | 2         | 6.5983         | 0.0042**       |
|                               | Status                                       |           |                |                |
| <b>Eggs Laid 24-48 hours</b>  | Oviposition Site                             | 2         | 108.039        | <0.0001***     |
|                               | Maternal Infection Status                    | 1         | 0.00001        | 0.99           |
|                               | Oviposition Site * Maternal Infection Status | 2         | 11.278         | 0.0042**       |
|                               | Status                                       |           |                |                |
| <b>Egg-to-Adult Viability</b> | Oviposition Site                             | 2         | 5.6058         | 0.0053**       |
|                               | Maternal Infection Status                    | 1         | 0.0128         | 0.88           |
|                               | Oviposition Site * Maternal Infection Status | 2         | 0.528          | 0.5917         |
|                               | Status                                       |           |                |                |
| <b>Clutch DCV Load</b>        | Oviposition Site                             | 2         | 2.5523         | 0.0988         |
|                               | Maternal Infection Status                    | 1         | 0.6277         | 0.4359         |
|                               | Oviposition Site * Maternal Infection Status | 2         | 1.4596         | 0.2522         |
|                               | Status                                       |           |                |                |

517

518 **Table 2.** Model outputs for statistical tests performed on all experiments testing the causes and costs

519 of infection avoidance in *D. melanogaster* adult oviposition. Significant predictors are marked with

520 asterisks (p<0.05=\*, p<0.01=\*\* and p<0.001=\*\*\*).

521

522 **Figure legends**

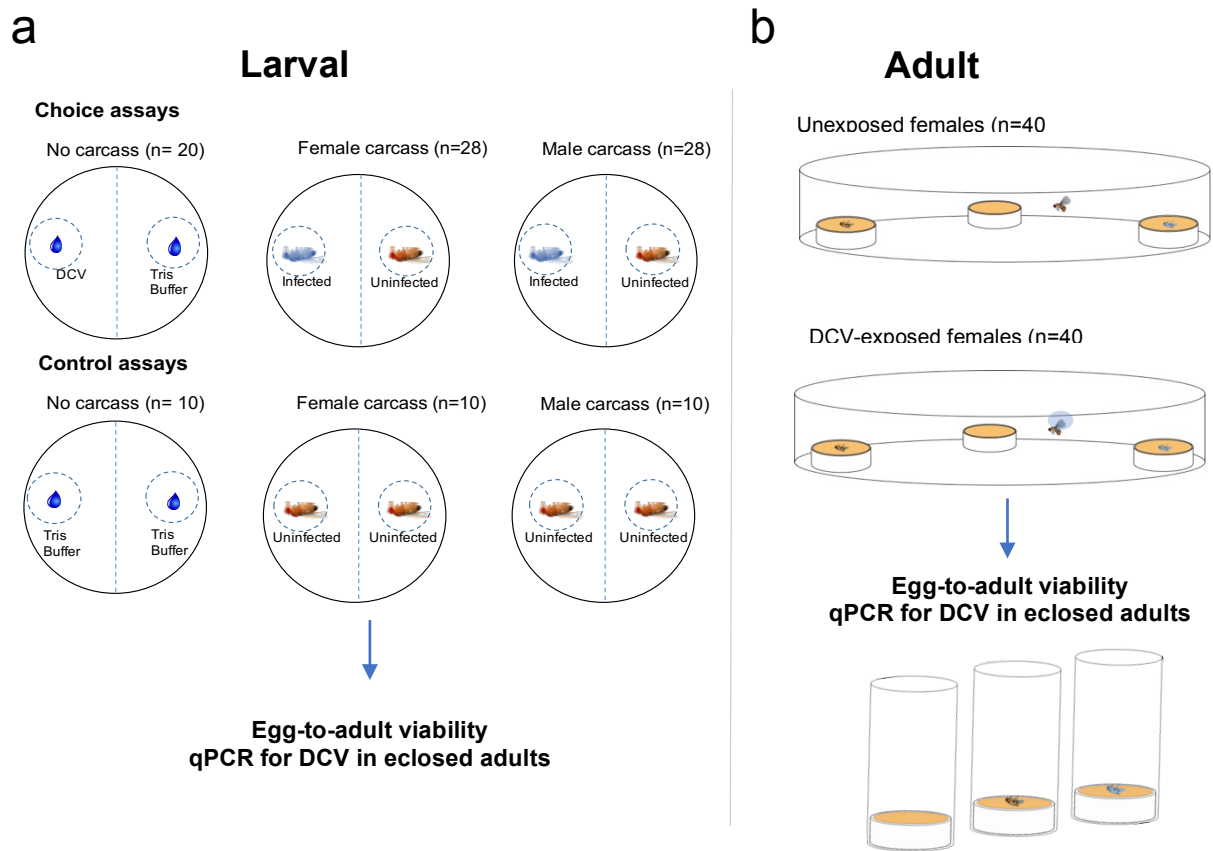

523

524 **Figure 1 - Experimental design**

525 (a) Two-choice chamber used to measure larval foraging choice when presented with  
 526 infectious and non-infectious food sources and the life-history data collected after the 72-  
 527 hour assay. Petri dishes were set up as either two-choice plates (containing an infectious and  
 528 non-infectious food source) or control plates (containing only non-infectious food sources).  
 529 Eggs were placed at the centre of each plate, allowed to hatch and left for 72 hours  
 530 whereupon the position of larvae was recorded to assay infection avoidance. (b) Three-choice  
 531 chamber used to assay oviposition site choice in infected and uninfected mothers when  
 532 presented with three sites containing just food, food and a fly carcass and food and an  
 533 infected fly carcass. The number of eggs laid at each site was measured twice at two 24 hour

534 intervals. After 48 hours, oviposition sites were removed and clutches were allowed to  
535 develop to adults whereupon the viral load of a randomly selected sub-sample was assayed.

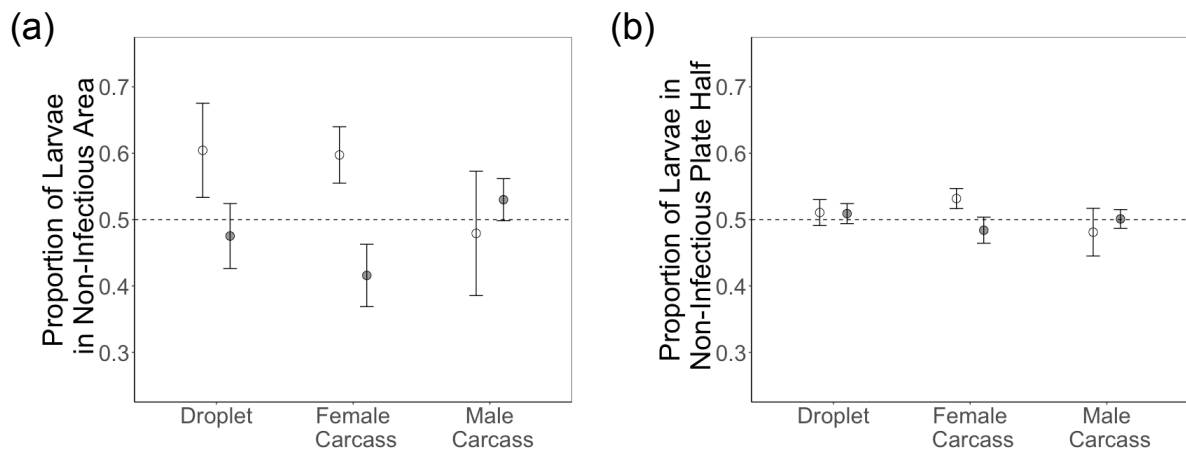

536

537

538 **Figure 2 – Larval foraging choice**

539 Mean±SE proportion of larvae on choice plates after 72 hours found (a) within area 2.2cm in  
540 diameter of the non-infectious food source and (b) on the non-infectious food source's half of  
541 the plate. Results from both choice (white points) and control plates (grey points) are shown.  
542 In the case of choice plates, where only non-infectious food sources are present, the  
543 mean±SE is derived from the proportion of larvae present at a randomly selected side of the  
544 plate. Food sources included droplets of TRIS, a male carcass or female carcass.



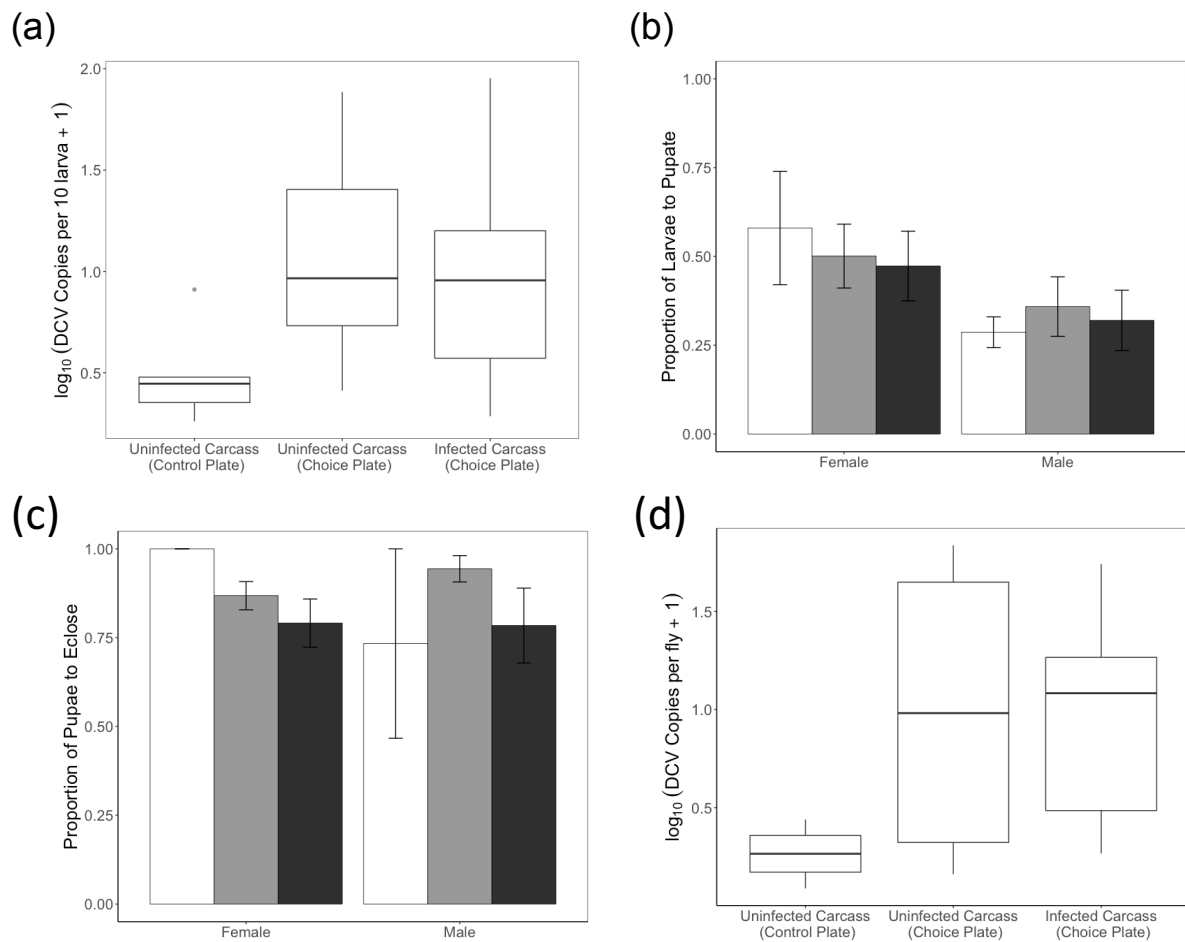

545

546 **Figure 3. Fitness consequences of infectious scavenging**

547 (a) The number of DCV copies present in larvae, quantified immediately after choice assays

548 having fed on an uninfected carcass on a control plate or a choice plate and an infected

549 carcass from a choice plate. Mean  $\pm$  SE proportion of larvae taken from carcass sites on both

550 choice and control plates to pupate (b) and (c) eclose. Larvae (and the subsequent pupae)

551 were taken from male and female carcasses and varied in their infectious status, an uninfected

552 carcass on a control plate (white bar), an uninfected carcass on a choice plate (grey bar) or an

553 infected carcass on a choice plate (black bar). (d) The number of DCV copies present in

554 adults derived from choice plate assays.

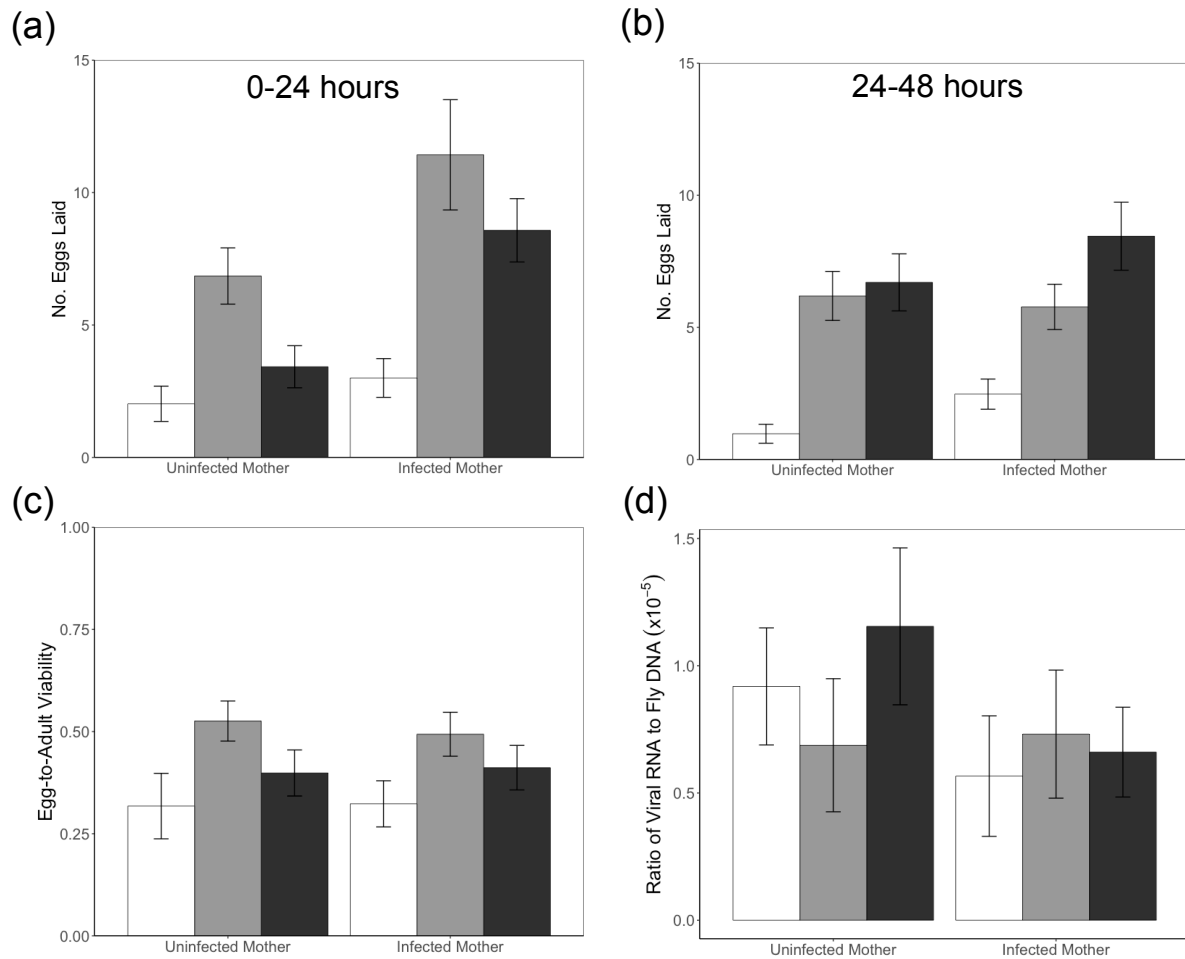

555

556 **Figure 4. Adult oviposition choice and fitness consequences**

557 The mean $\pm$ SE number of eggs laid by infected and uninfected mothers at the three  
 558 oviposition sites after (a) the first 24 hours of the experiment and (b) the second 24-hour  
 559 period. (c) The mean  $\pm$  SE proportion of eggs to develop through to adulthood (egg-to-adult  
 560 viability) of the clutches laid during the oviposition site choice assay. (d) The mean  $\pm$  SE  
 561 ratio of viral RNA to fly DNA in the clutches laid during the oviposition site choice assay.  
 562 Across all panels, oviposition site treatments are shown using the same colour scheme: food  
 563 only oviposition sites in white, food and uninfected carcass sites in grey and food and  
 564 infected fly carcass sites in black.
